# Supplementary material
Source: publisher site journal article supplement (http://www.spandidos-publications.com/5148/downloadSupplementary)

Figure S1. Body weight of mice injected with human and mouse BC cells. (A) Body weight of mice injected with EO771 sh-control and sh-MCT4 mouse BC cells at day 15. (B) Body weight of mice injected with MDA-MB-231 sh-control and sh-MCT4 mouse BC cells at day 15. BC, breast cancer; MCT4, monocarboxylate transporter 4; sh, short hairpin.

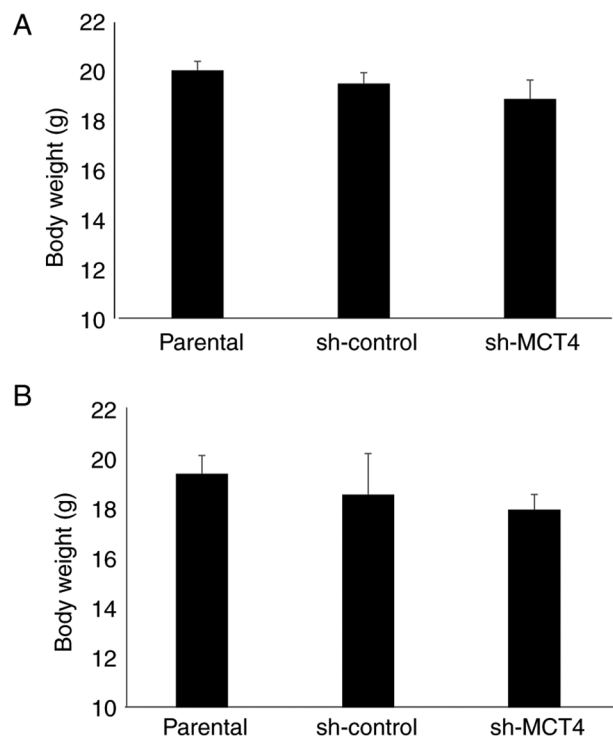

Supplement: Supplementary file 1 [file downloadSupplementary]
